# Supplementary material for: An intercomparison of satellite, airborne, and ground-level observations with WRF-CAMx simulations of NO 2 columns over Houston, TX during the September 2021 TRACER-AQ campaign
Source: Copernicus journal article supplement (doi:10.5194/egusphere-2023-2844), 2023-12-01

*Supplement of*

**An intercomparison of satellite, airborne, and ground-level  
observations with WRF-CAMx simulations of NO<sub>2</sub> columns over  
5 Houston, TX during the September 2021 TRACER-AQ  
campaign**

**Nawaz et al.**

*Correspondence to M. Omar Nawaz (nawaz.muhammad@email.gwu.edu)*

10

**Table S1: WRF physics options and data sources**

| WRF Option            | Option Selected                                                        |
|-----------------------|------------------------------------------------------------------------|
| Analysis Data         | 0.25° GDAS (IC/BCs and analysis nudging on the 36 and 12 km domains)   |
| Microphysics          | Thompson                                                               |
| Longwave Radiation    | Rapid Radiative Transfer Model (RRTMG)                                 |
| Shortwave Radiation   | RRTMG                                                                  |
| Surface Layer Physics | Revised MM5 surface layer scheme                                       |
| LSM                   | Noah                                                                   |
| PBL scheme            | Yonsei University (YSU)                                                |
| Cumulus scheme        | Multi-Scale Kain-Fritsch (MSKF) on 36/12 km; none for 4/1.333/0.444 km |

**Table S2: Vertical layer mapping from WRF to CAMx**

| WRF Layer No. | WRF Eta Level | WRF Layer Pressure (mb) | WRF Layer Top (m) | CAMx Layer No. | CAMx Layer Top (m) | CAMx Layer Thickness (m) |
|---------------|---------------|-------------------------|-------------------|----------------|--------------------|--------------------------|
| 44            | 0.000         | 50.00                   | 20576             |                |                    |                          |
| 43            | 0.010         | 59.63                   | 19458             |                |                    |                          |
| 42            | 0.025         | 74.08                   | 18082             | 30             | 18082              | 3885                     |
| 41            | 0.045         | 93.35                   | 16616             |                |                    |                          |
| 40            | 0.065         | 112.61                  | 15427             |                |                    |                          |
| 39            | 0.090         | 136.69                  | 14198             | 29             | 14198              | 2977                     |
| 38            | 0.115         | 160.77                  | 13169             |                |                    |                          |
| 37            | 0.145         | 189.67                  | 12120             |                |                    |                          |
| 36            | 0.175         | 218.57                  | 11221             | 28             | 11221              | 1850                     |
| 35            | 0.210         | 252.28                  | 10304             |                |                    |                          |
| 34            | 0.250         | 290.81                  | 9372              | 27             | 9372               | 1599                     |
| 33            | 0.290         | 329.34                  | 8534              |                |                    |                          |
| 32            | 0.330         | 367.87                  | 7773              | 26             | 7773               | 1269                     |
| 31            | 0.370         | 406.40                  | 7073              |                |                    |                          |
| 30            | 0.405         | 440.12                  | 6504              | 25             | 6504               | 1040                     |
| 29            | 0.440         | 473.83                  | 5969              |                |                    |                          |
| 28            | 0.475         | 507.54                  | 5464              | 24             | 5464               | 870                      |
| 27            | 0.510         | 541.26                  | 4985              |                |                    |                          |
| 26            | 0.540         | 570.16                  | 4594              | 23             | 4594               | 737                      |
| 25            | 0.570         | 599.05                  | 4219              |                |                    |                          |
| 24            | 0.600         | 627.95                  | 3857              | 22             | 3857               | 684                      |
| 23            | 0.630         | 656.85                  | 3509              |                |                    |                          |
| 22            | 0.660         | 685.75                  | 3174              | 21             | 3174               | 325                      |
| 21            | 0.690         | 714.64                  | 2849              | 20             | 2849               | 314                      |
| 20            | 0.720         | 743.54                  | 2535              | 19             | 2535               | 304                      |
| 19            | 0.750         | 772.44                  | 2231              | 18             | 2231               | 247                      |
| 18            | 0.775         | 796.52                  | 1984              | 17             | 1984               | 241                      |
| 17            | 0.800         | 820.60                  | 1744              | 16             | 1744               | 235                      |
| 16            | 0.825         | 844.68                  | 1509              | 15             | 1509               | 230                      |
| 15            | 0.850         | 868.76                  | 1279              | 14             | 1279               | 135                      |
| 14            | 0.865         | 883.21                  | 1144              | 13             | 1144               | 134                      |
| 13            | 0.880         | 897.66                  | 1010              | 12             | 1010               | 132                      |
| 12            | 0.895         | 912.11                  | 878               | 11             | 878                | 130                      |
| 11            | 0.910         | 926.56                  | 748               | 10             | 748                | 86                       |
| 10            | 0.920         | 936.19                  | 662               | 9              | 662                | 85                       |
| 9             | 0.930         | 945.82                  | 577               | 8              | 577                | 84                       |

|         |       |         |     |   |     |    |
|---------|-------|---------|-----|---|-----|----|
| 8       | 0.940 | 955.46  | 493 | 7 | 493 | 84 |
| 7       | 0.950 | 965.09  | 409 | 6 | 409 | 83 |
| 6       | 0.960 | 974.72  | 326 | 5 | 326 | 82 |
| 5       | 0.970 | 984.35  | 243 | 4 | 243 | 82 |
| 4       | 0.980 | 993.99  | 162 | 3 | 162 | 81 |
| 3       | 0.990 | 1003.62 | 81  | 2 | 81  | 48 |
| 2       | 0.996 | 1009.40 | 32  | 1 | 32  | 32 |
| 1       | 0.998 | 1011.32 | 16  |   |     |    |
| surface | 1.000 | 1013.25 | 0   | 0 | 0   |    |

20 **Table S3: Science options for the CAMx simulation**

| Science Options                       | CAMx Configuration                                                                            |
|---------------------------------------|-----------------------------------------------------------------------------------------------|
| Version                               | Version 7.20                                                                                  |
| Time Zone                             | CST                                                                                           |
| Vertical Grid Mesh                    | 30 Layers with 32 m deep surface layer and 15 layers in the lowest 1.5 km                     |
| Horizontal Grids                      | 2-way nested grids with spacings of 1.333 and 0.444 km                                        |
| Meteorology                           | 2021 WRF meteorology                                                                          |
| Chemistry Mechanism                   | CB6r5 gas-phase mechanism                                                                     |
| Chemistry Solver                      | EBI                                                                                           |
| Probing Tool                          | Ozone Source Apportionment Technology (OSAT)                                                  |
| Photolysis Rates                      | TUV version 4.8 with TOMS ozone column adjustment and in-line adjustment for clouds           |
| Advection Scheme                      | Piecewise Parabolic Method (PPM)                                                              |
| Planetary Boundary Layer (PBL) mixing | K-theory with KV100 patch to enhance vertical mixing over urban areas within the lowest 100 m |
| In-line Ix Emissions On               | Inorganic iodine (Ix) emissions from saltwater areas                                          |
| Parallelization                       | MPI (18 threads) and OMP (6 threads)                                                          |

**Table S4: Major energy generation units in and around Houston, TX and their monthly NOx emissions**

| Number | Energy Generation Unit            | NOx (tons/month) |
|--------|-----------------------------------|------------------|
| 1      | Air Liquide Bayport Complex       | 570.7            |
| 2      | Cedar Bayou                       | 73.0             |
| 3      | W A Parish                        | 34.7             |
| 4      | Odyssey Energy Altura Cogen, LLC  | 34.6             |
| 5      | Texas City Cogeneration           | 30.8             |
| 6      | Pasadena Power Plant              | 27.4             |
| 7      | Channelview Cogeneration Facility | 25.9             |
| 8      | Deer Park Energy Center           | 25.0             |
| 9      | South Houston Green Power Site    | 25.0             |
| 10     | TH Wharton                        | 18.1             |
| 11     | Greens Bayou                      | 11.6             |

25

Figure S1: Ratio of TROPOMI NO<sub>2</sub> columns with the new CAMx AMF compared to the operational AMF.

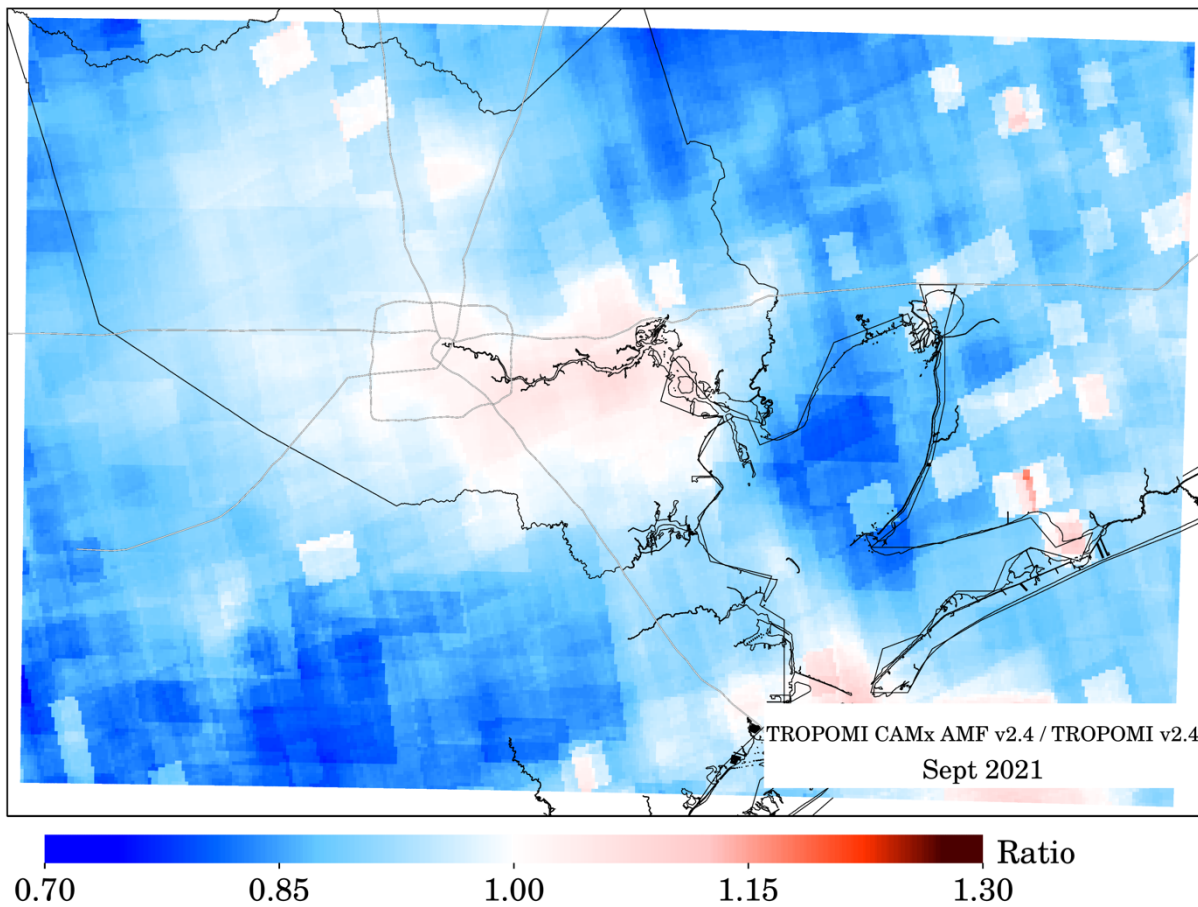

35 **Figure S2: Spatial comparison of GCAS, TROPOMI, and CAMx on September 1, 2021.** © OpenStreetMap contributors 2023. Distributed under the Open Data Commons Open Database License (ODbL) v1.0.

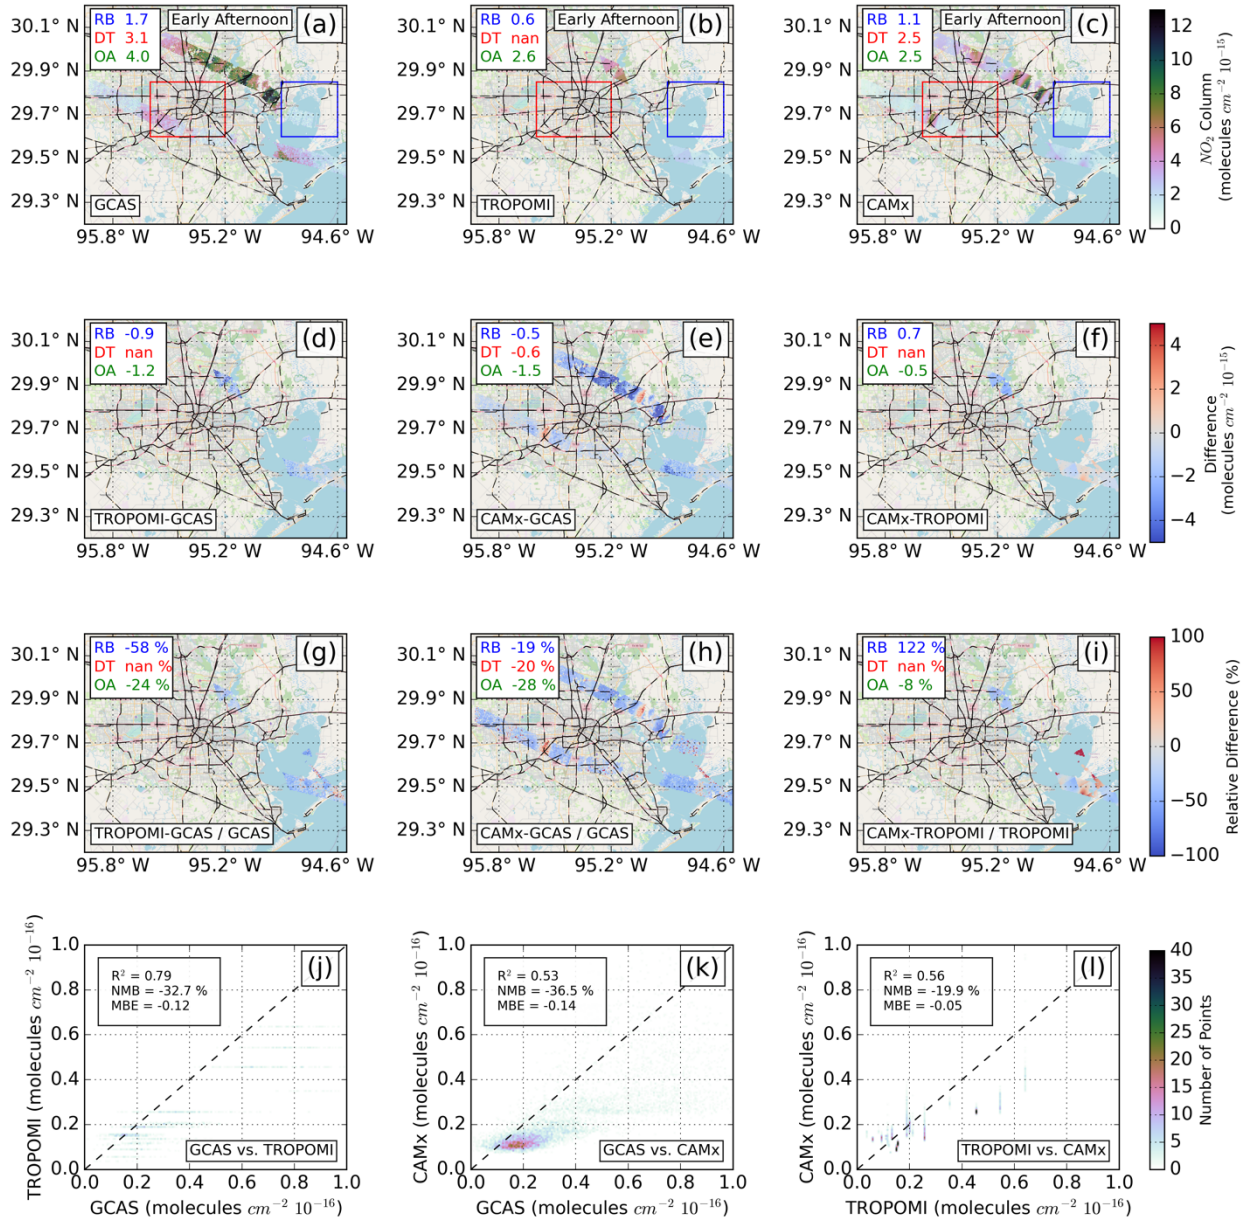

Figure S3: Spatial comparison of GCAS, TROPOMI, and CAMx on September 3, 2021. © OpenStreetMap contributors 2023. Distributed under the Open Data Commons Open Database License (ODbL) v1.0.

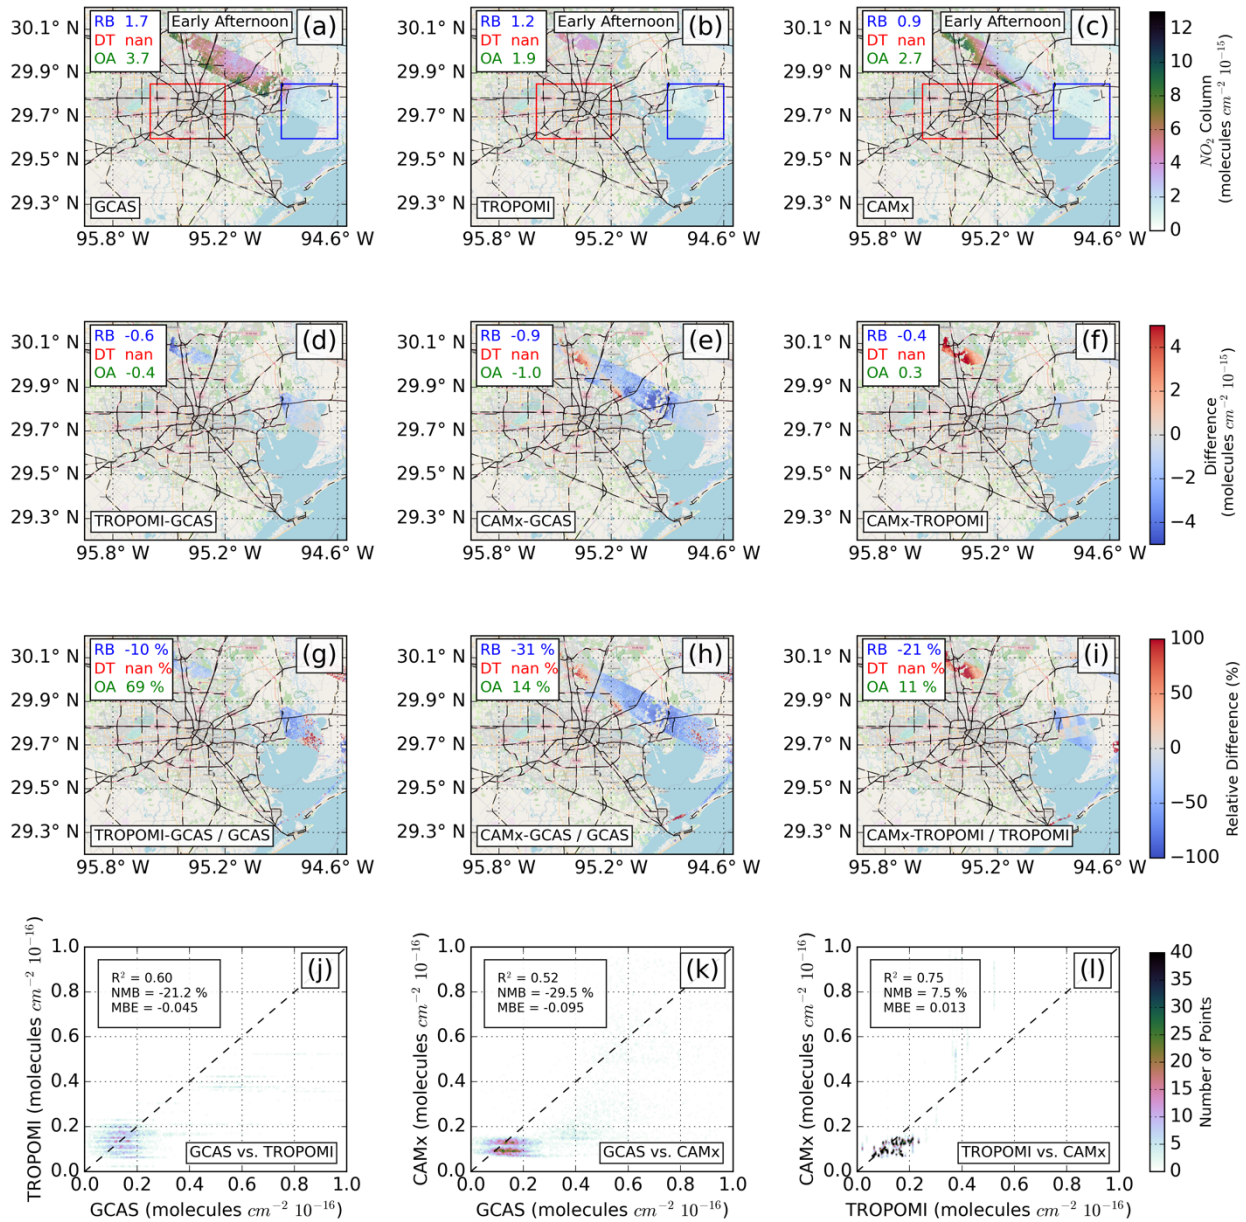

45 **Figure S4: Spatial comparison of GCAS, TROPOMI, and CAMx on September 8, 2021.** © OpenStreetMap contributors 2023. Distributed under the Open Data Commons Open Database License (ODbL) v1.0.

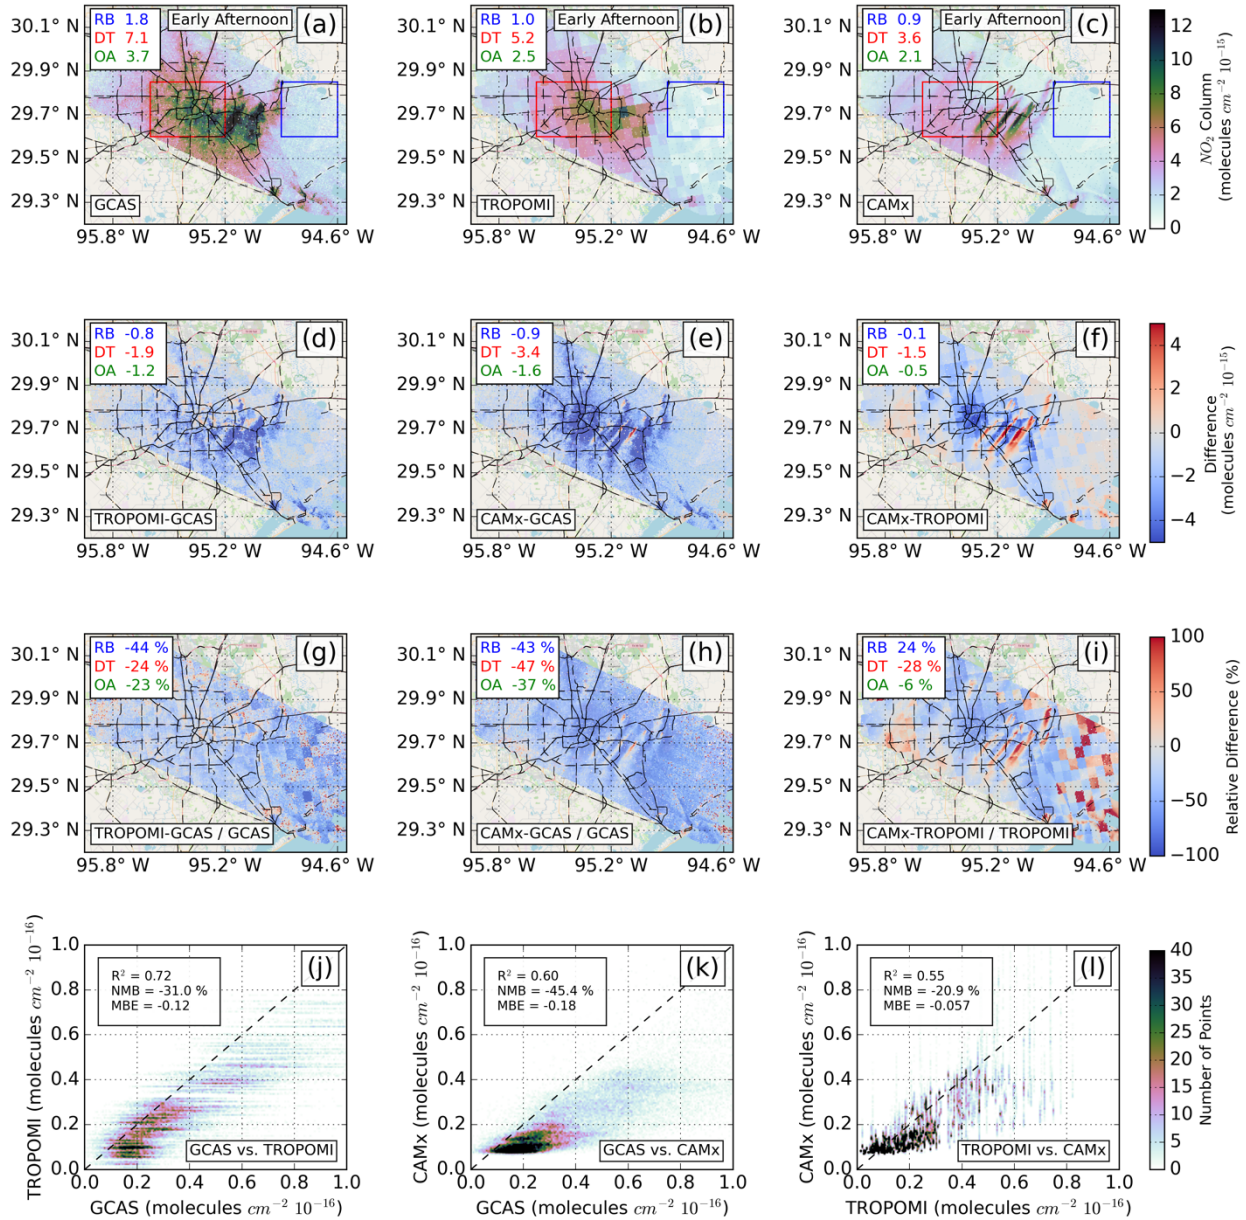

**Figure S5: Spatial comparison of GCAS, TROPOMI, and CAMx on September 9, 2021. © OpenStreetMap contributors 2023. Distributed under the Open Data Commons Open Database License (ODbL) v1.0.**

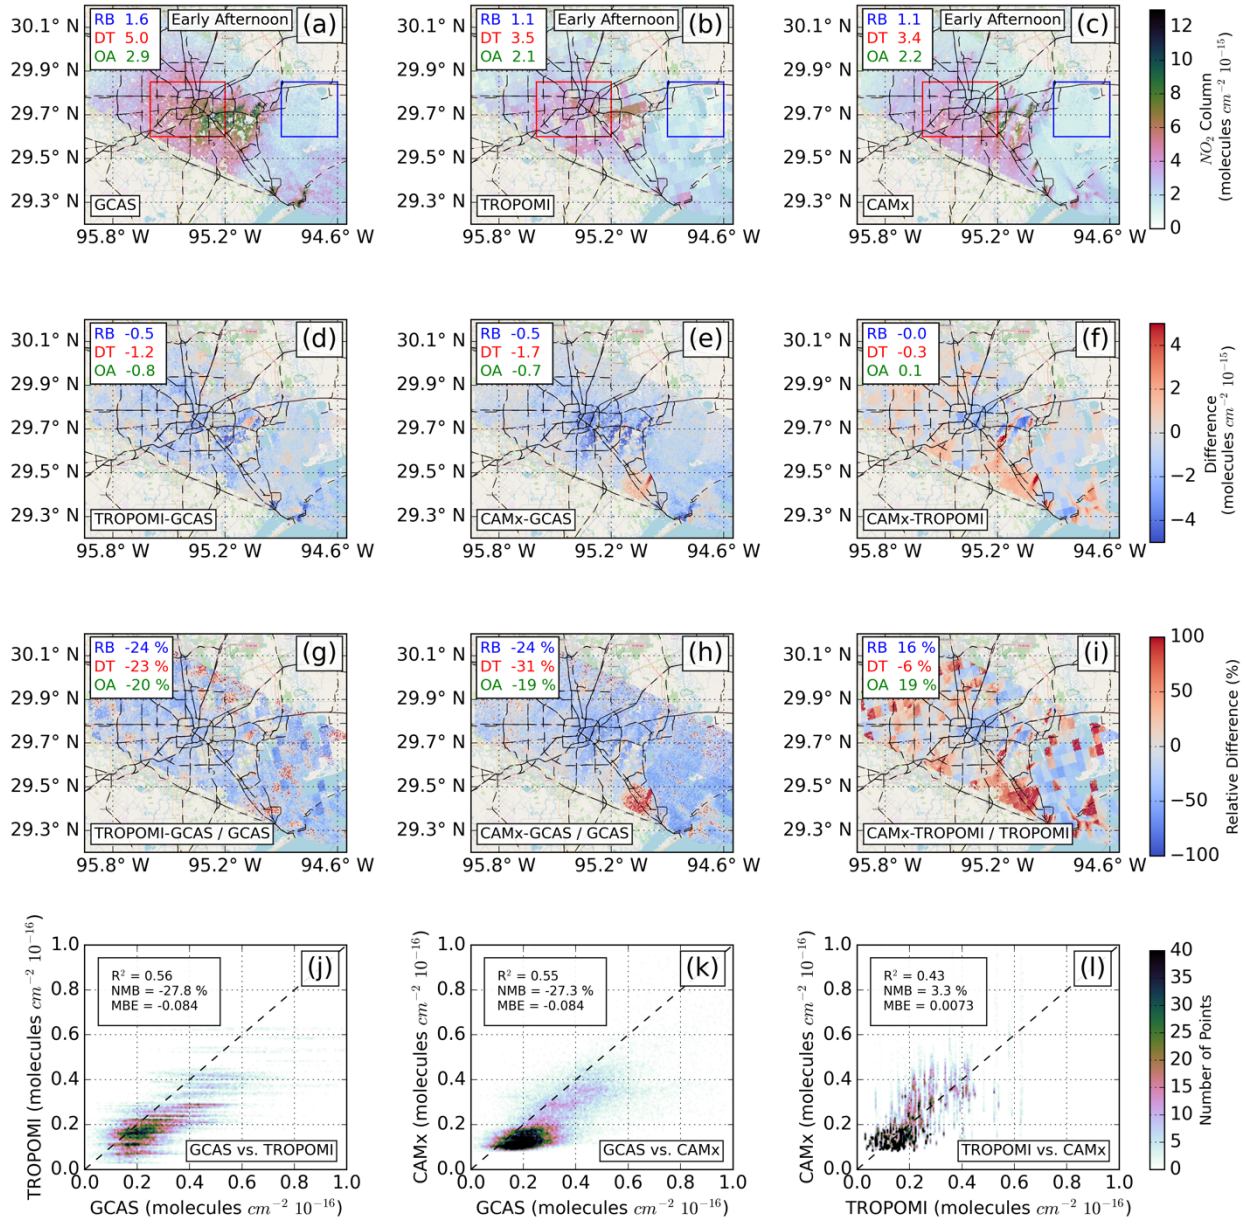



55 **Figure S6: Spatial comparison of GCAS, TROPOMI, and CAMx on September 10, 2021. © OpenStreetMap contributors 2023. Distributed under the Open Data Commons Open Database License (ODbL) v1.0.**

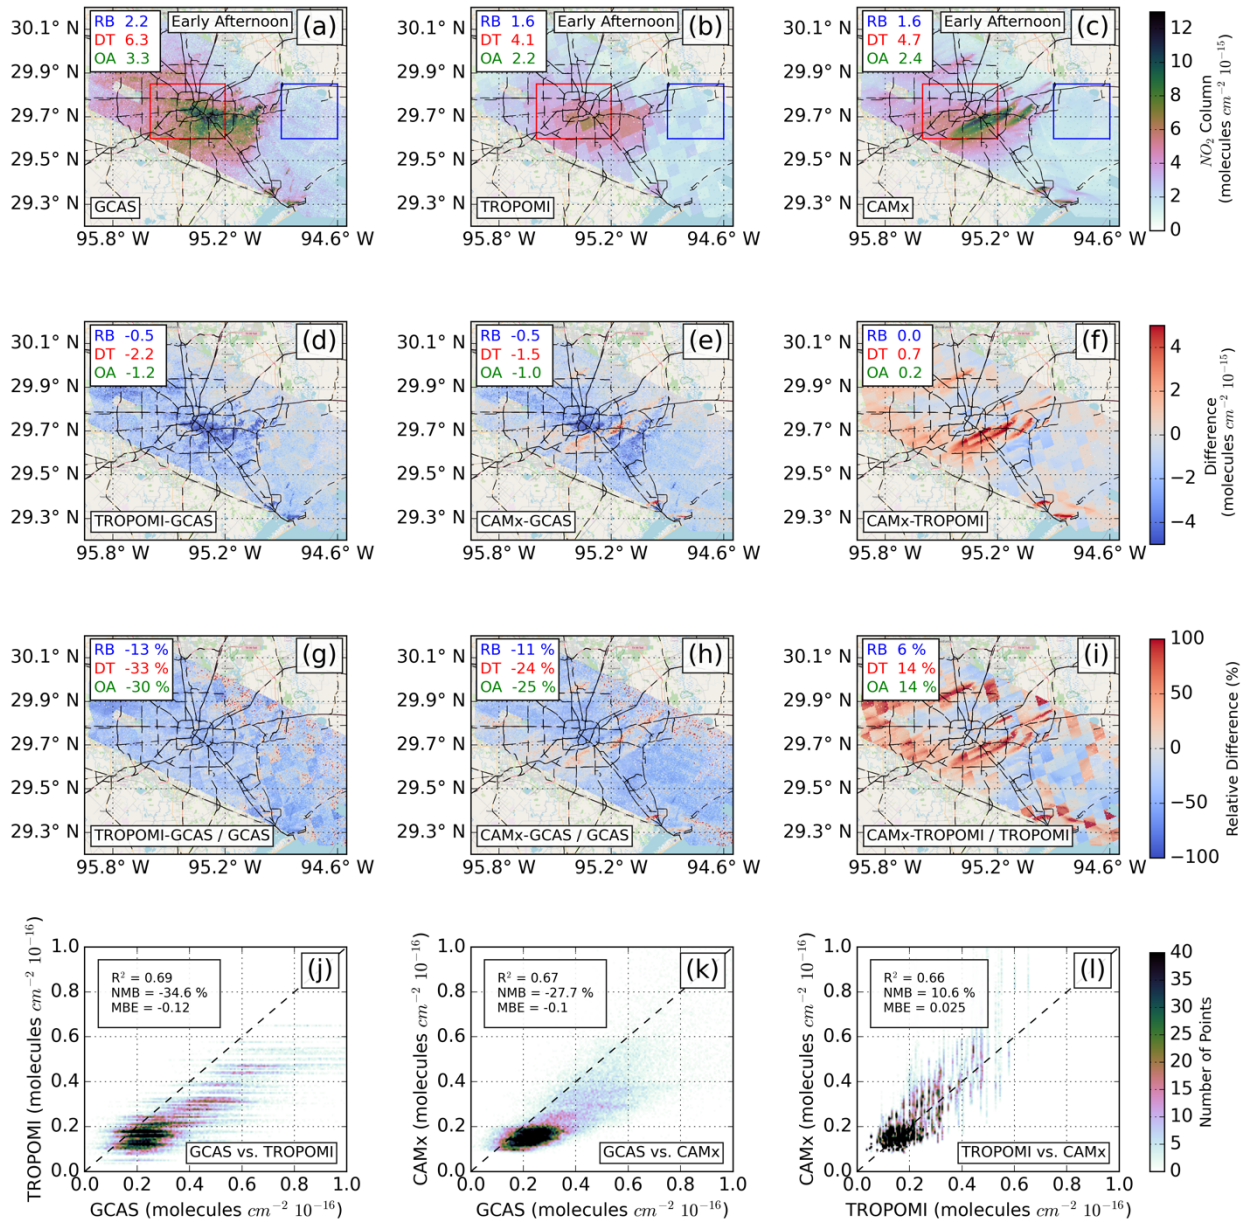

**Figure S7: Spatial comparison of GCAS, TROPOMI, and CAMx on September 11, 2021. © OpenStreetMap contributors 2023. Distributed under the Open Data Commons Open Database License (ODbL) v1.0.**

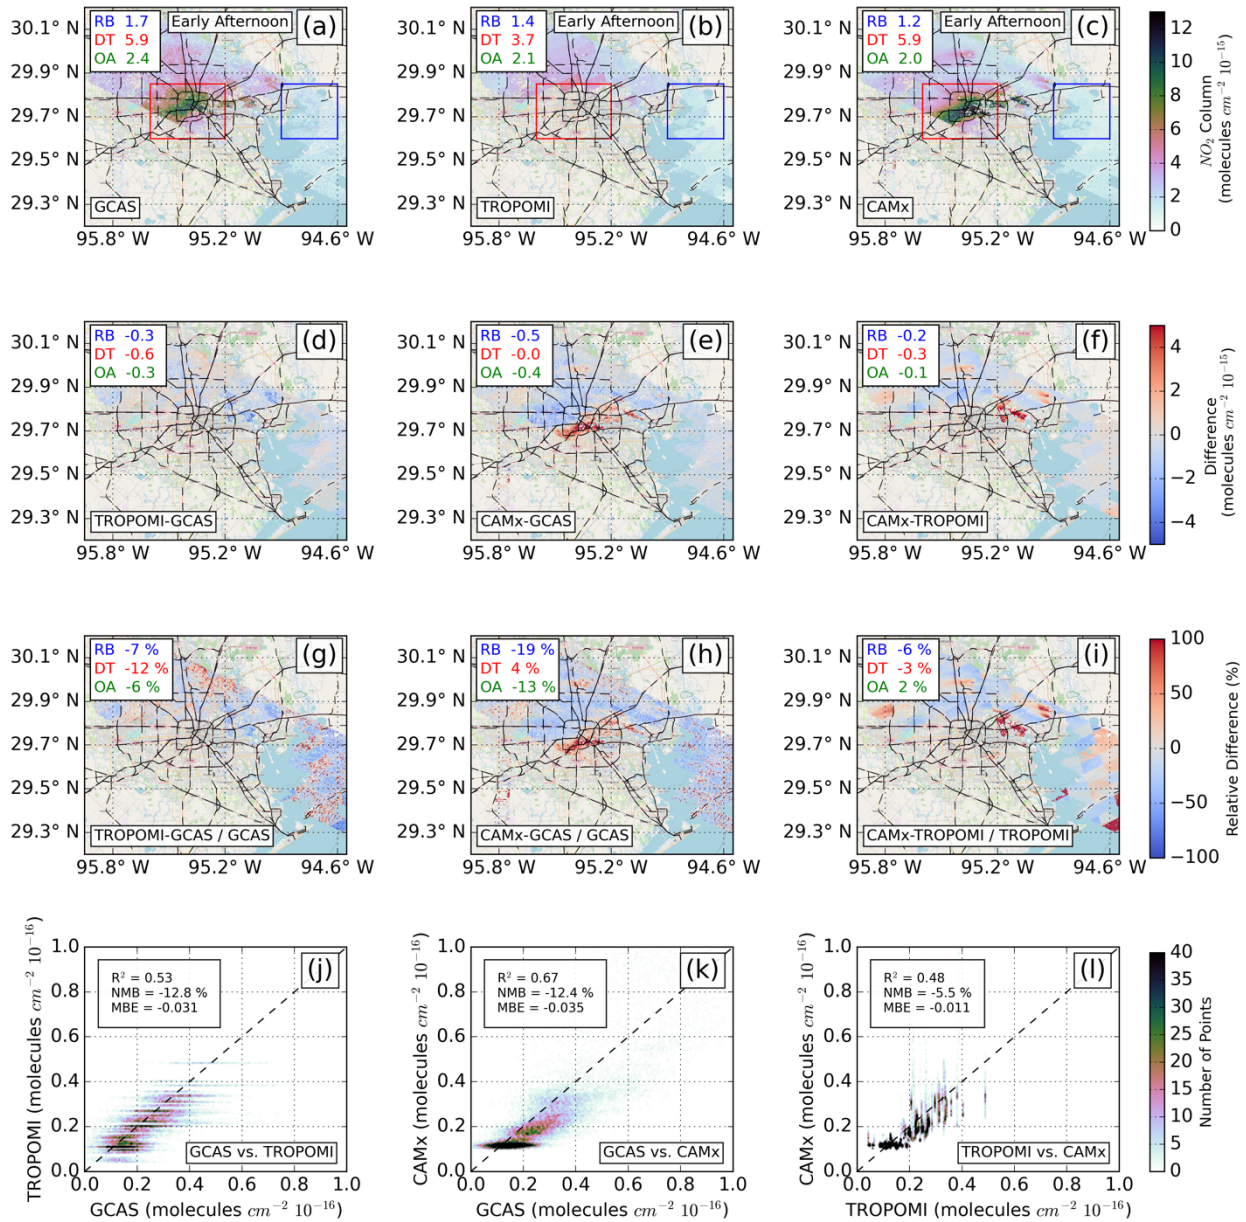

**Figure S8: Spatial comparison of GCAS, TROPOMI, and CAMx on September 23, 2021. © OpenStreetMap contributors 2023. Distributed under the Open Data Commons Open Database License (ODbL) v1.0.**

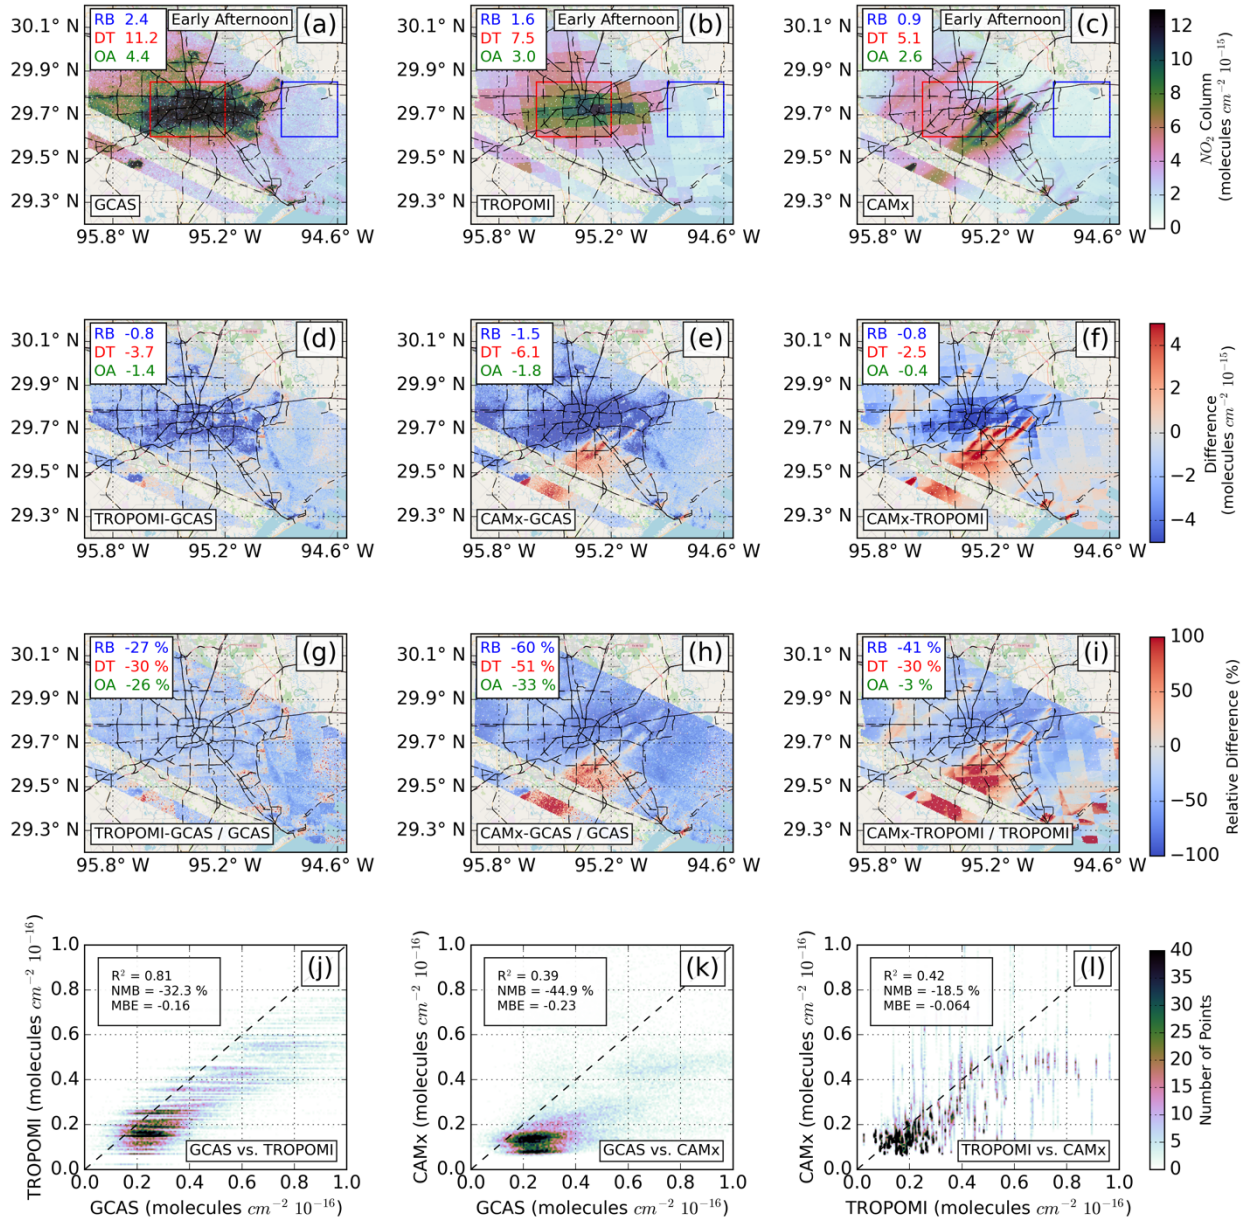

**Figure S9: Spatial comparison of GCAS, TROPOMI, and CAMx on September 24, 2021. © OpenStreetMap contributors 2023. Distributed under the Open Data Commons Open Database License (ODbL) v1.0.**

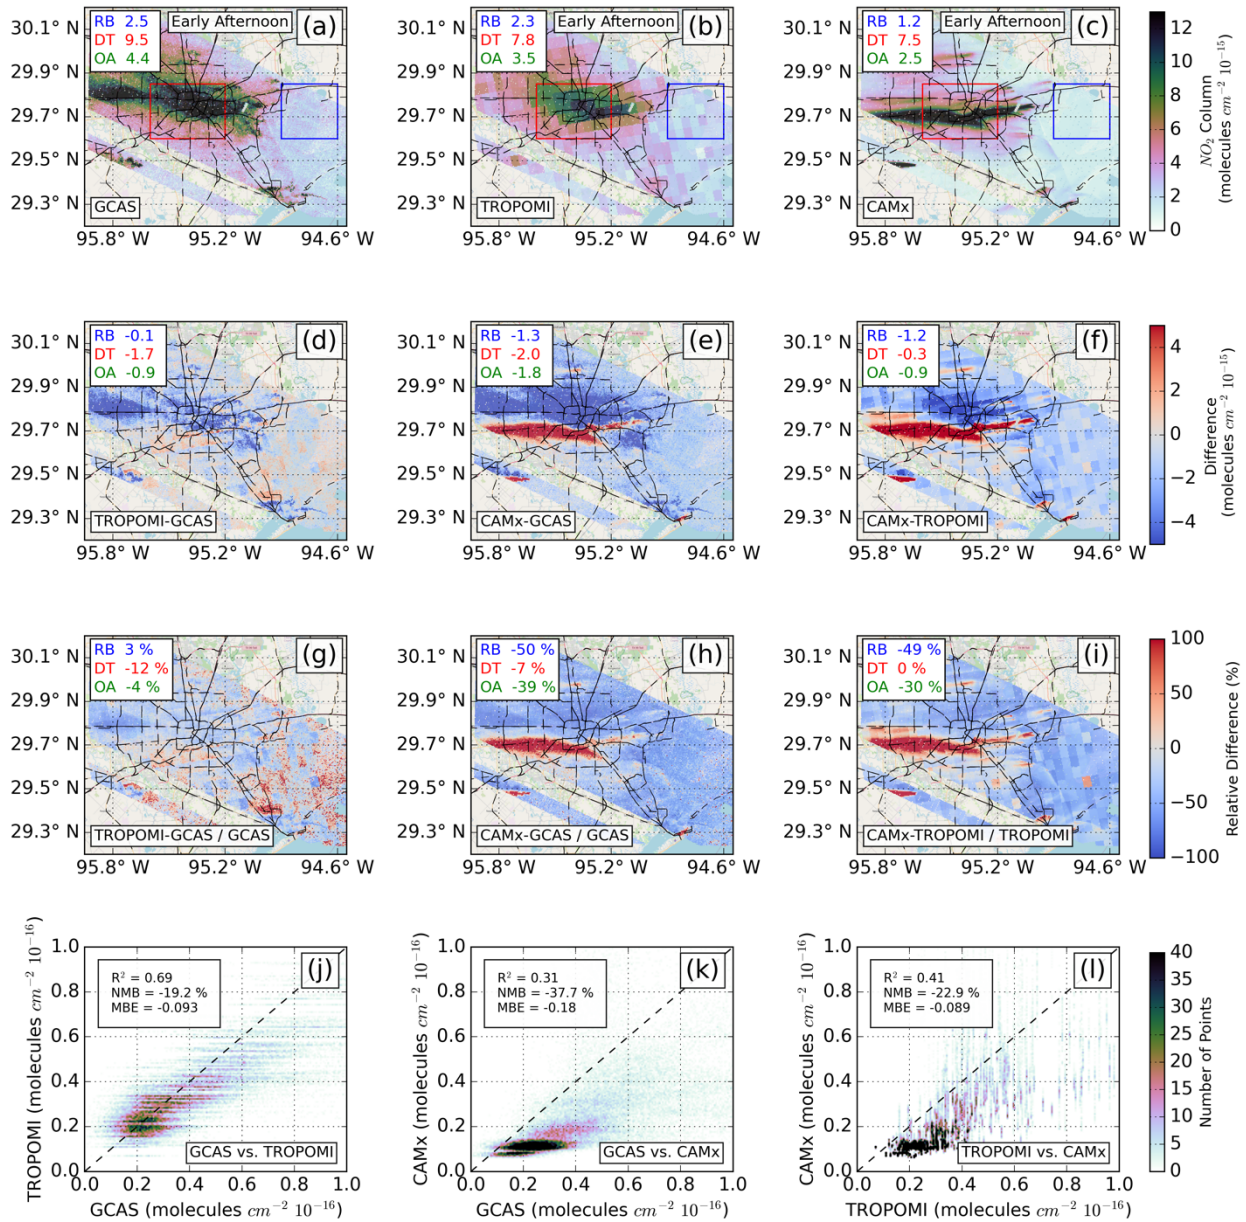

**Figure S10: Spatial comparison of GCAS, TROPOMI, and CAMx on September 25, 2021. © OpenStreetMap contributors 2023. Distributed under the Open Data Commons Open Database License (ODbL) v1.0.**

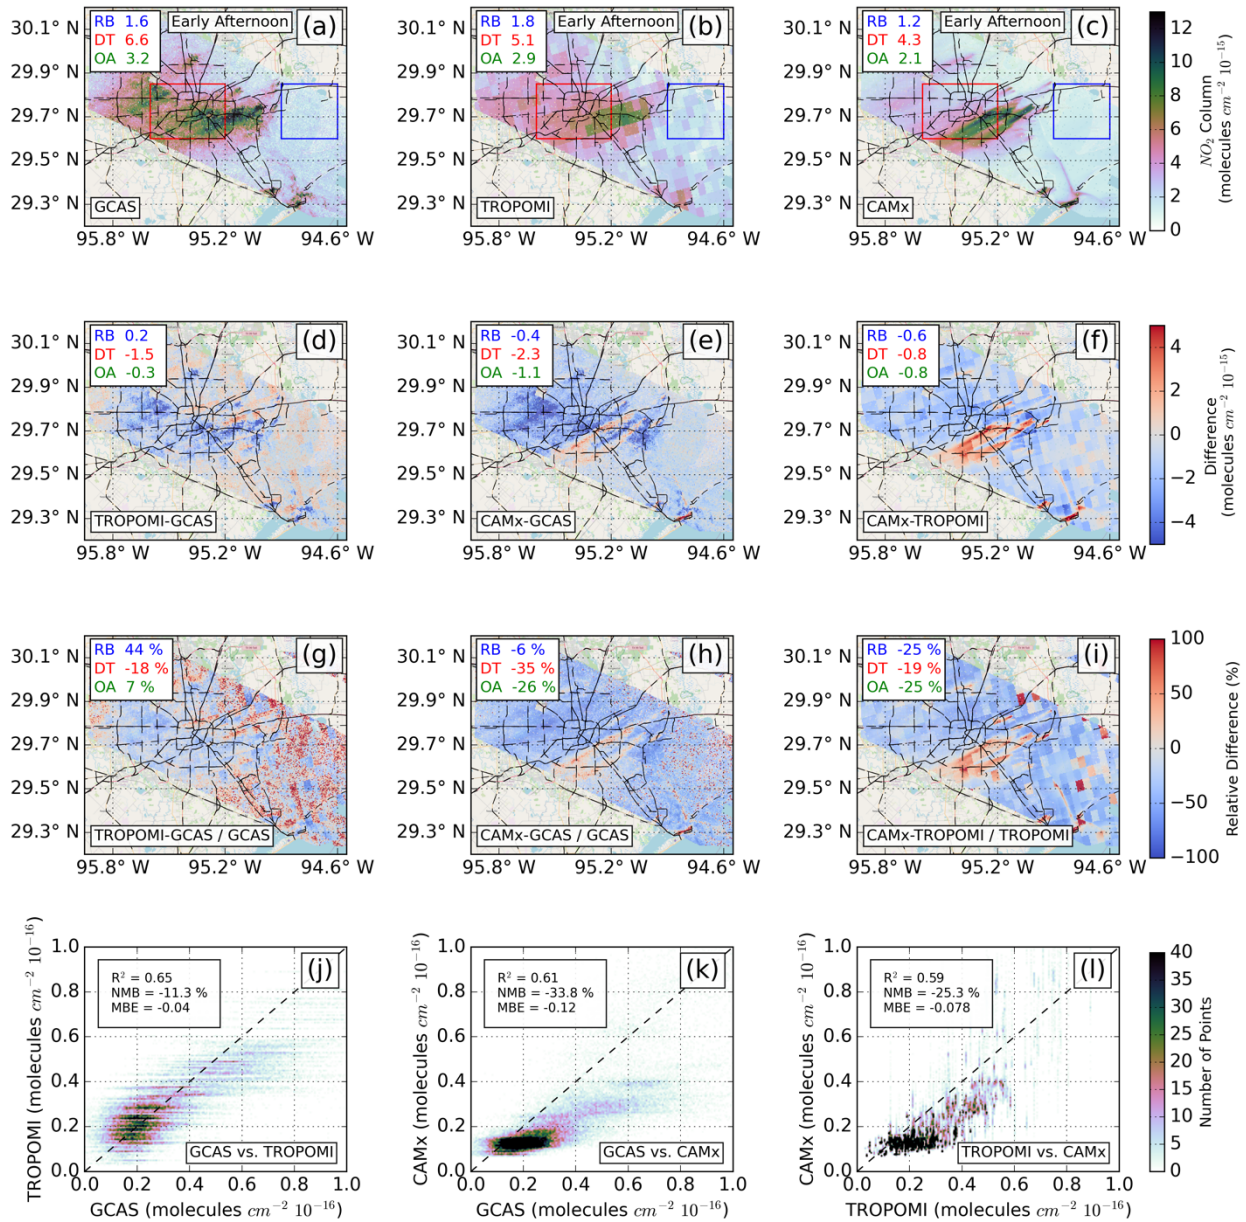

**Figure S11: Spatial comparison of GCAS, TROPOMI, and CAMx on September 26, 2021. © OpenStreetMap contributors 2023. Distributed under the Open Data Commons Open Database License (ODbL) v1.0.**

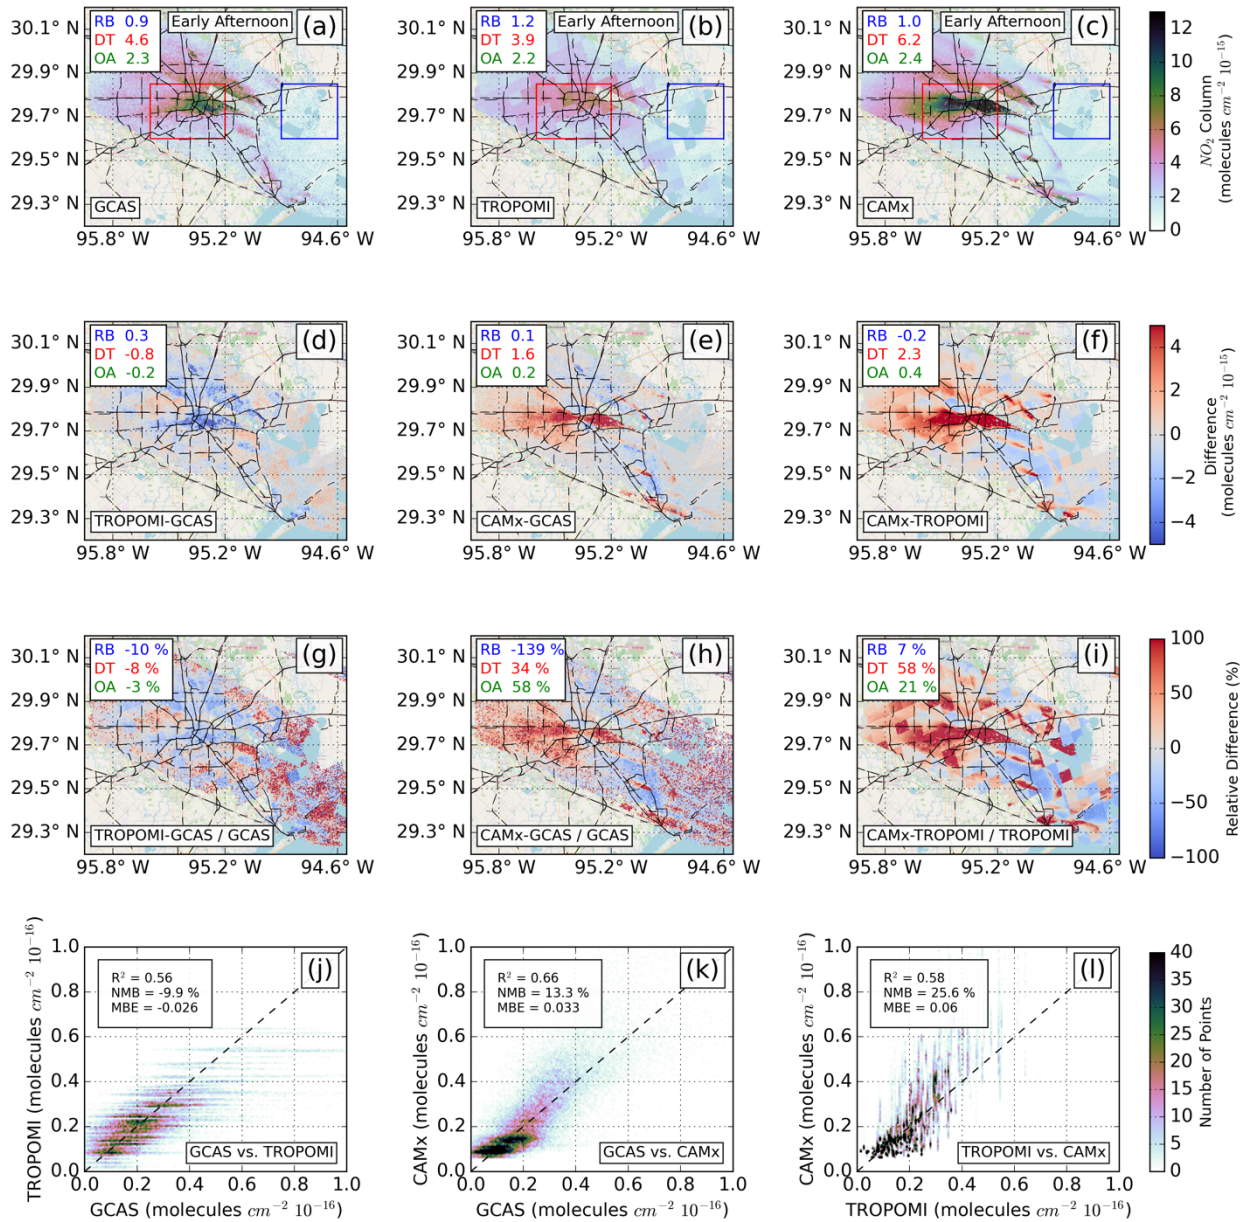

Figure S12: Map of notable features in and around Houston. © OpenStreetMap contributors 2023. Distributed under the Open Data Commons Open Database License (ODbL) v1.0.

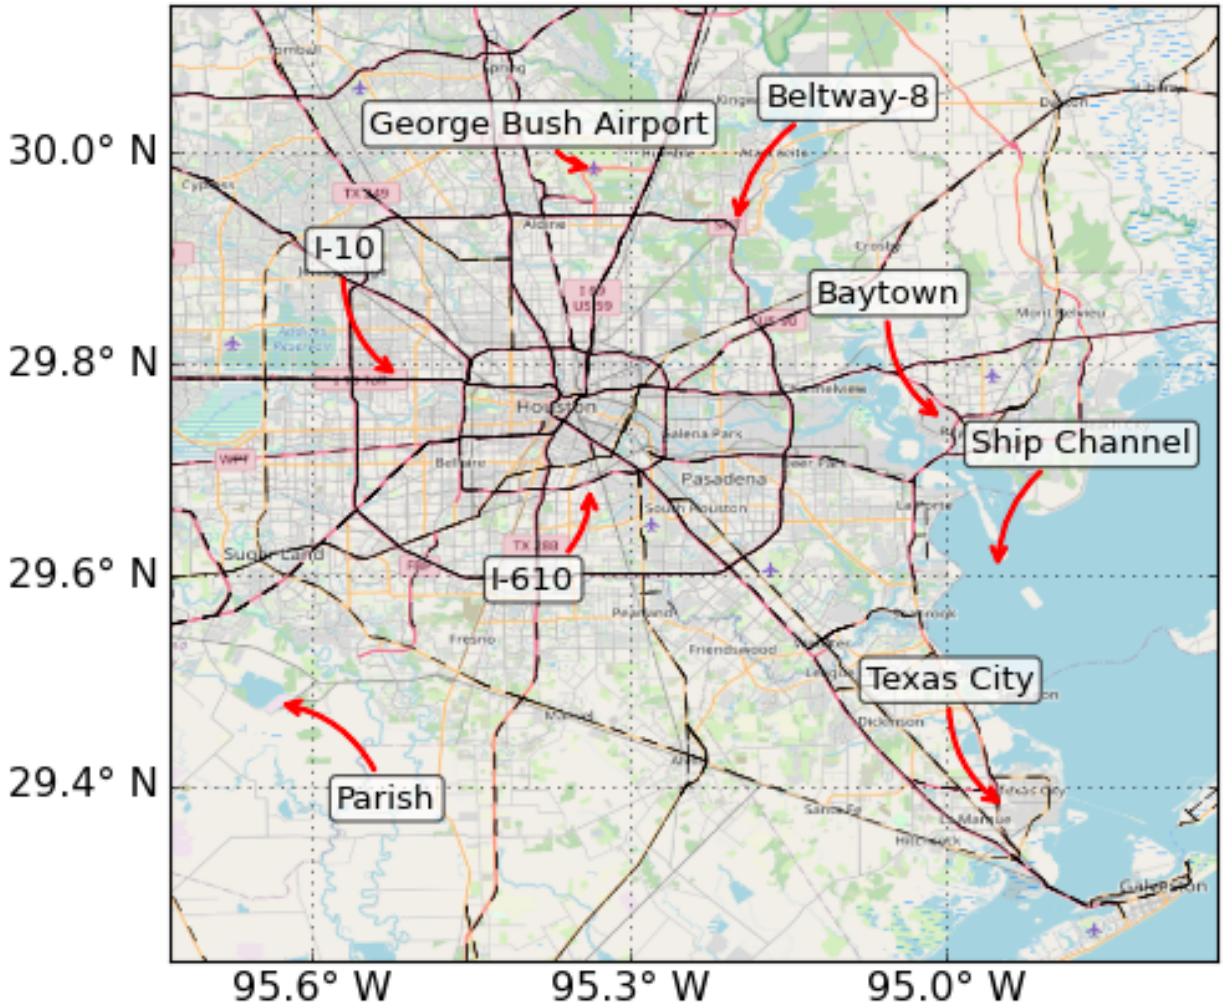

**Figure S13: Spatial comparison of GCAS, TROPOMI, and CAMx at the  $0.25^\circ \times 0.25^\circ$  resolution. © OpenStreetMap contributors 2023. Distributed under the Open Data Commons Open Database License (ODbL) v1.0.**

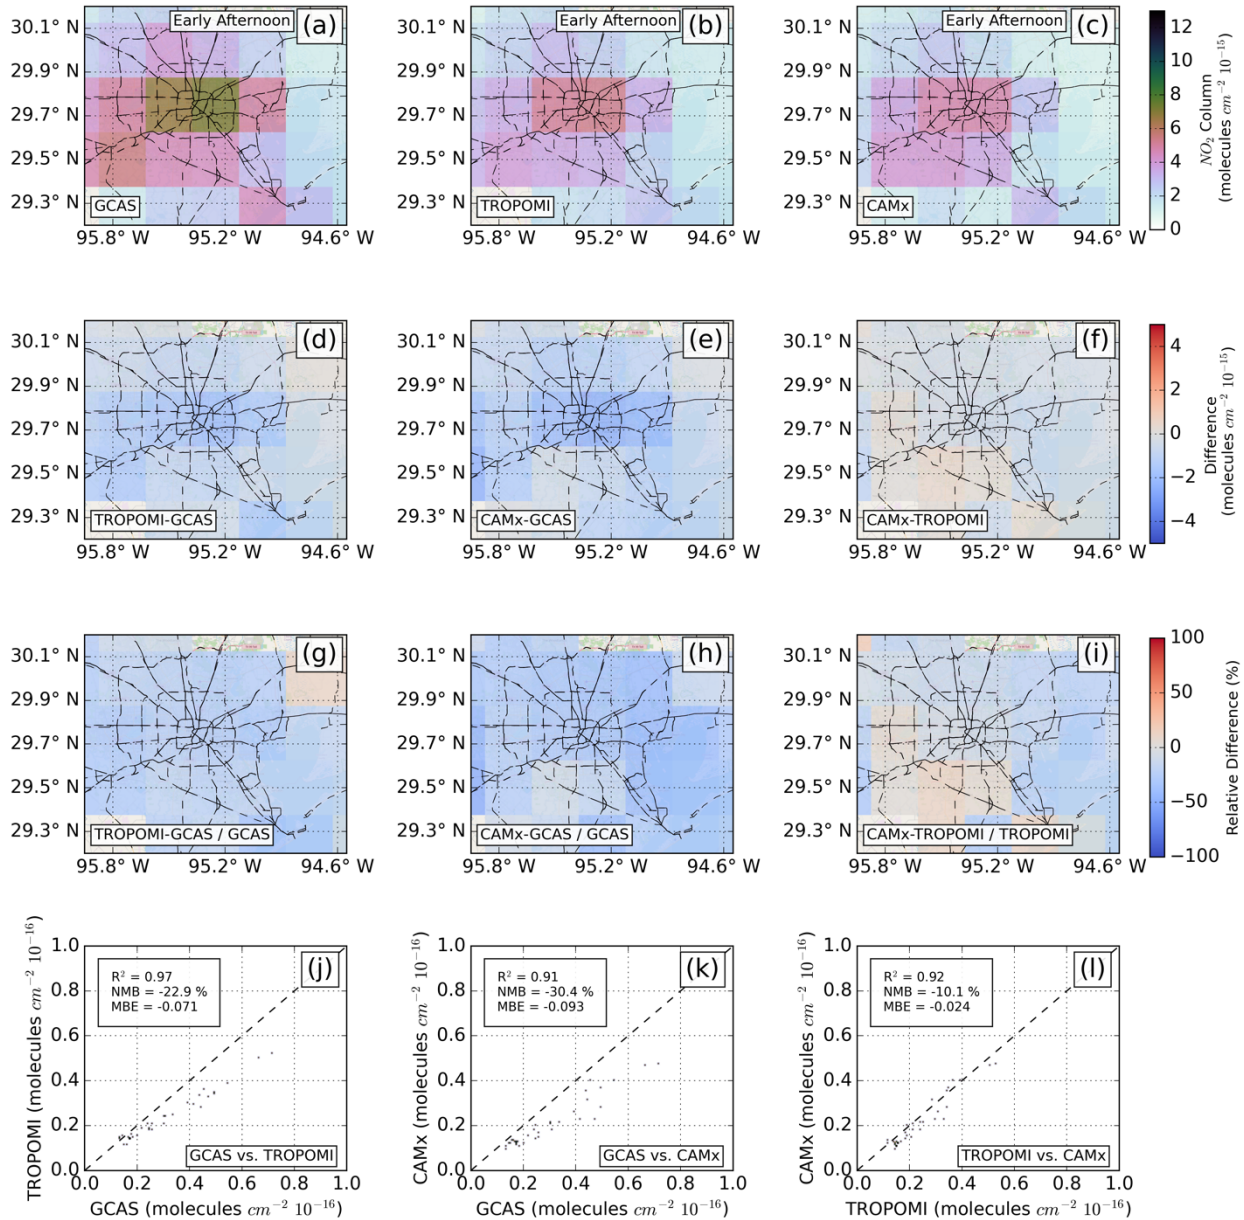



**Figure S14: Spatial comparison of GCAS, TROPOMI, and CAMx at the  $0.1^\circ \times 0.1^\circ$  resolution. © OpenStreetMap contributors 2023. Distributed under the Open Data Commons Open Database License (ODbL) v1.0.**

105

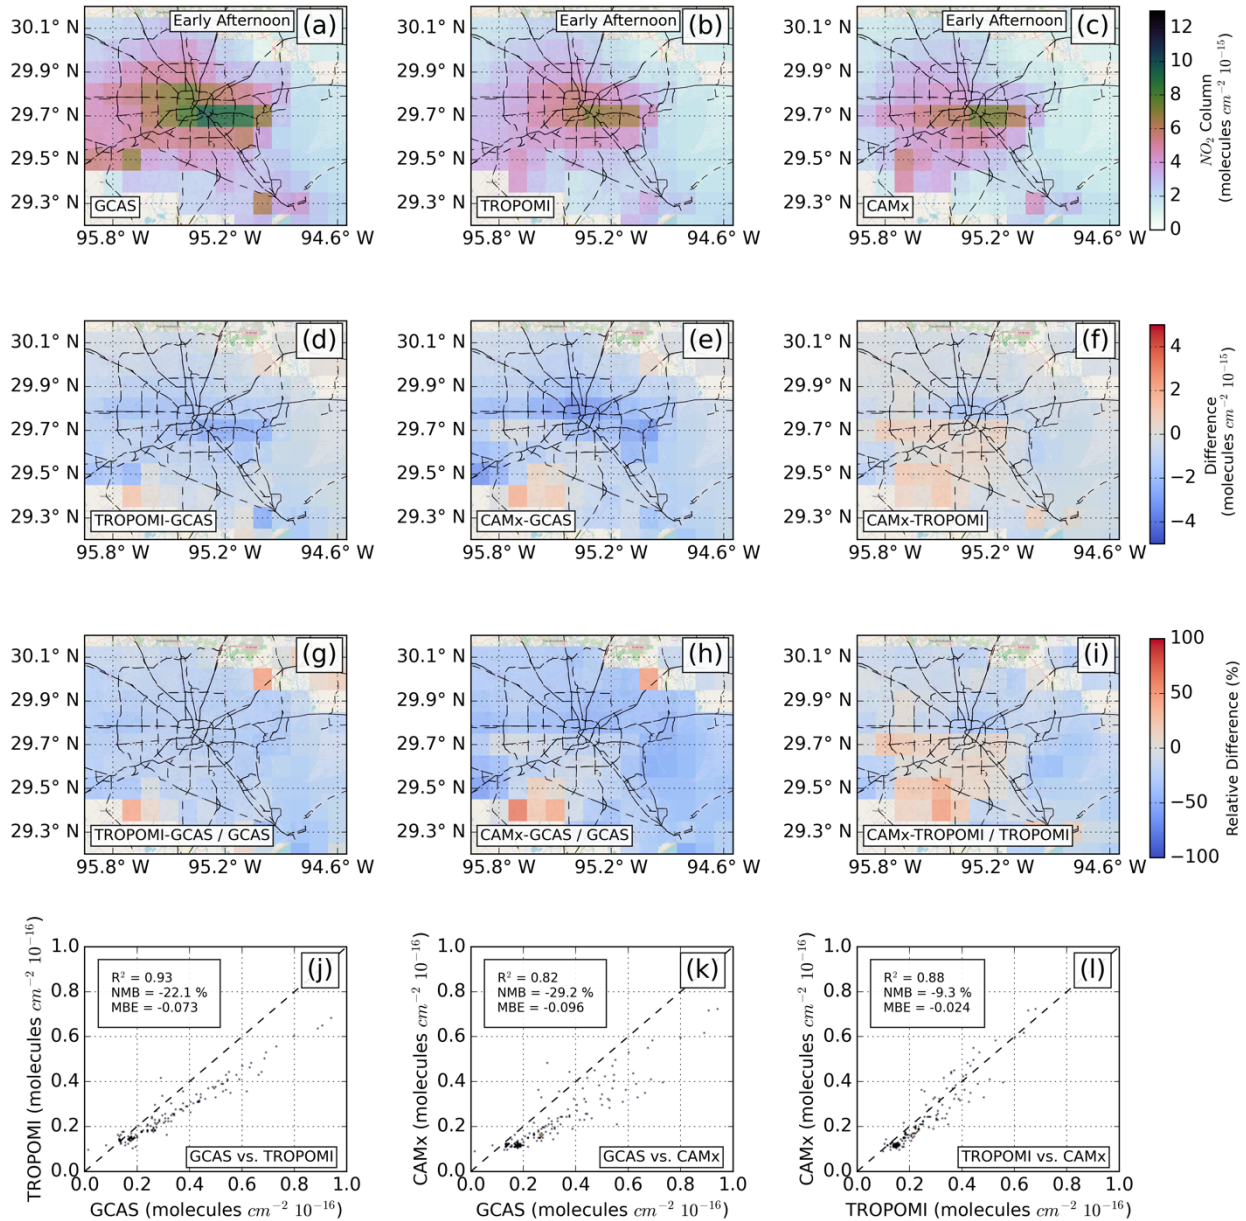

Supplement: Supplementary file 1 [file egusphere-2023-2844-supplement.pdf]
